# 1 Spatial and social structure of rewilded laboratory mice

2 Caleb C. Vogt<sup>1\*</sup>, Matthew N. Zippel<sup>1</sup>, Daniel D. Sprockett<sup>2</sup>, Caitlin H. Miller<sup>1</sup>, Summer H. Hardy<sup>1</sup>,  
3 Matthew Arthur<sup>1</sup>, Adam M. Greenstein<sup>1</sup>, Melanie Colvin<sup>1</sup>, Andrew H. Moeller<sup>2</sup>, Michael J. Sheehan<sup>1\*</sup>

4  
5 <sup>1</sup>Laboratory for Animal Social Evolution and Recognition, Department of Neurobiology and Behavior,  
6 Cornell University, Ithaca, NY 14853

7 <sup>2</sup>Department of Ecology and Evolutionary Biology, Cornell University, Ithaca, NY 14853

8 \*Correspondence to: [ccv26@cornell.edu](mailto:ccv26@cornell.edu), [msheehan@cornell.edu](mailto:msheehan@cornell.edu)

9

## 10 HIGHLIGHTS

- 11 ● We describe emergent spatial and social structures of rewilded C57BL/6J (C57) lab mice across  
12 replicated trials in outdoor field enclosures and compare them to wild-derived outbred mice  
13 ● Both C57 and outbred males rapidly establish and maintain territories  
14 ● C57 females explore the field enclosures substantially more than any other group  
15 ● With the exception of C57 females, most mice spent the majority of their recorded time alone  
16 ● The resulting societies formed by C57 mice are less modular, more densely connected, and less  
17 stable than those formed by wild-derived outbred mice

18

19 **Keywords:** Rewilding, laboratory mice, space use, social structure, territoriality

20

## 21 Abstract

22 As an essential biomedical model organism, house mice have been studied intensely under laboratory  
23 conditions, yet they evolved to survive and reproduce in complex and dynamic environments. There  
24 has been recent interest in the study of ‘rewilded’ mice reared in complex outdoor environments,  
25 particularly for understanding the brain and behavior. Yet little work has examined lab mouse behavior  
26 under free-living conditions. Here, we characterize the emergent spatial and social structure of  
27 replicated populations of C57BL/6J (C57) mice over 10 days in large outdoor field enclosures and  
28 compare them to populations of recently wild-derived outbred house mice under the same conditions.  
29 We observed shared aspects of space use and social structure across all trials but found that C57  
30 societies differed from those emerging from outbred mice across multiple dimensions. Males of both  
31 genotypes rapidly established and then defended territories. Female C57 mice spent more time with  
32 other individuals and explored more space relative to all other groups. These behavioral differences  
33 resulted in C57 mice rapidly forming less stable, but more densely connected, social networks than  
34 outbred wild-derived mice. These data suggest that laboratory domestication has had larger effects on  
35 female mouse social organization than their male counterparts. Importantly, this work demonstrates  
36 that C57 mice recapitulate many, but not all, aspects of social structures generated by wild mice in  
37 outdoor conditions. Rewilding allows for tractable, replicable, and ecologically realistic approaches to

38 studying mouse behavior and can facilitate the study of the biological basis of higher order social  
39 organization.

40

## 41 **INTRODUCTION**

42 Laboratory house mice are the premier model organism in biomedical research due to their small size,  
43 rapid breeding cycle, and the ready deployment of precise experimental manipulations using powerful  
44 genetic and neurobiological tools<sup>1-4</sup>. Studying mice in the lab affords tremendous experimental control  
45 allowing for the fine-scale dissection of proximate mechanisms across a range of biological fields  
46 including genetics, physiology, and neuroscience<sup>2,5,6</sup>. While controlled conditions are necessary for  
47 many experiments, there has been a growing recognition that indoor lab environments limit our ability  
48 to understand many complex biological processes<sup>7-9</sup>. This motivation is especially strong in  
49 neuroscience, where a growing number of researchers have highlighted a need to study the brain and  
50 behavior in enriched environments that can elicit an animal's full repertoire of natural behaviors<sup>10-16</sup>.  
51 Constrained lab environments inherently limit the study of patterns of space use or social behavior  
52 that require realistic natural spatial scales relevant to the organism. Even relatively large and enriched  
53 lab settings<sup>17-19</sup> fail to capture many of the relevant features of social interactions and social structures  
54 inferred by studies of wild mouse populations to be important to mouse natural history, such as  
55 territoriality and space use<sup>20-24</sup>.

56 An immediate solution is to study the behavior of lab mice in large natural spaces. There is a  
57 long history of studies utilizing large enclosures to study the population biology of mice under free-  
58 living conditions<sup>25-35</sup>. These studies tend to use feral or wild-derived populations of outbred house  
59 mice and find that male mice establish and aggressively defend territories occupied by several females  
60 and their offspring. Fully adult males are most often associated with high quality territories, while  
61 juveniles and subadults typically aggregate in lower quality spaces within the environment<sup>26,36,37</sup>. Adult  
62 females also aggressively defend territories against male and female intruders<sup>38-41</sup>. However, multiple  
63 lines of evidence demonstrate that lab mouse strains commonly used for behavioral research differ  
64 from their wild counterparts in aspects of their behavior and physiology due to generations of  
65 inbreeding, artificial selection for fecundity and docility, and rearing in chronically impoverished cage  
66 environments<sup>2,42-46</sup>. It is not known if lab mice adopt similar social structures to wild mice under  
67 natural conditions. Though a small number of studies have studied rewilded lab mice in outdoor  
68 enclosures<sup>47-51</sup>, they have not detailed the social behavior or emergent social structure of these  
69 animals. As a result, fundamental features of lab mouse behavior under free-living natural conditions  
70 remains poorly understood.

71 Characterizing the behavior of individuals and emergent social structures of lab mice under  
72 free-living conditions are critical first steps for 'rewilding' the field of neuroscience. The consistency of  
73 social structures under similar conditions has been poorly explored in mice and other animals, yet  
74 common garden studies of social organization have the potential to reveal which factors shape animal  
75 societies. Realized social organizations in populations may be highly variable if they are determined by

76 idiosyncratic individual behaviors and historical contingencies. Alternatively, populations with similar  
77 initial ecological and demographic conditions may reliably generate similar social structures, suggesting  
78 that the biological basis of social organization is amenable to study.

79 Here we report the space use and social behavior of replicated populations of the common  
80 laboratory strain C57BL/6J (C57) in large outdoor field enclosures located in upstate New York, USA.  
81 We also conducted identical, simultaneous trials using outbred wild-derived house mice. Thus, our  
82 dataset both describes how lab mice freely behave in large outdoor spaces and allows for a direct  
83 comparison of the similarities and differences in behavior between C57 and genetically outbred wild-  
84 derived mice as well as their emergent social structures under the same conditions.

85

## 86 RESULTS

### 87 *Rewilded mouse behavior and social structure in the field*

88 Field studies of wild populations provide a powerful means to link aspects of organismal biology to  
89 selection, but are typically hampered by a lack of replication<sup>52,53</sup>. Enclosure studies conducted over  
90 short, but biologically relevant, periods provide an opportunity to observe replicate populations across  
91 multiple trials. Over a three-month period (June 2020 - August 2020), we performed replicate trials to  
92 examine the emergent social organization generated in enclosures stocked with 10 female and 10 male  
93 house mice (*Mus musculus domesticus*) from the domesticated lab mouse strain C57 (n = 4) and  
94 outbred wild-derived house mice (n = 3). The mouse population density in our enclosure was ~0.034  
95 mice per square meter, which falls within the range of typical population densities reported for wild  
96 mice<sup>54</sup>. Our outdoor field enclosures are approximately 9,000 times larger than the area of a standard  
97 laboratory mouse cage (**Fig. 1a; Fig. S1a-b**). Each field enclosure contained eight weather protected  
98 resource zones (made from 32-gallon rubber storage totes), which were equally distributed in a 2x4  
99 grid. We supplied all resource zones with food and water accessible by the mice *ad libitum*.  
100 Additionally, we monitored the zones continuously over the trial period via an infrared video camera  
101 and a radio frequency identification (RFID) antenna placed beneath the sole entrance into the zone  
102 (**Fig. 1a; Fig S1c**). To initiate each trial, we placed mice into one of the eight resource zones with their  
103 same-sex cage mates in the evening shortly before sunset, meaning that all individuals started the  
104 trials in a resource zone in a social context.

105 Over the course of 10 days, mice explored the enclosures and resource zones, formed  
106 territories, and engaged in a variety of social interactions with conspecifics including courtship, mating,  
107 co-nesting, and fighting (**Fig. 1a; Video S1**). As the goal here is to identify the patterns of space use and  
108 social structure, we focus our analyses on the RFID dataset. We obtained high density sampling of  
109 mouse RFID reads for all trials (1,198,377 ± 102,782 RFID reads per trial; mean ± SEM) and a mean of  
110 6,205 ± 236 RFID reads per mouse per day (**Table S1**). Mice were able to quickly traverse the distance  
111 between the zones despite the ground vegetation (minimum inter-zone travel time = 10 seconds,  
112 mean = 85.6 minutes, maximum = 16.4 hours; **Fig. S1d**). To convert instantaneous mouse RFID reads  
113 into estimates of how long mice spent in or around the zones, we grouped RFID reads into state events

114 with durations (**Fig. S1e**; see Methods for grouping procedure). The total number of visits to a zone  
115 strongly predicted the total estimated duration of time spent in a zone (Spearman's correlation,  $R >$   
116  $0.84$ ,  $P < 0.001$  for all genotype and sex combinations; **Fig. S1f**). Using this approach, we estimated  
117 individual mouse location for a total of 5833.3 mouse hours across all trials (mean =  $833.3 \pm 52.1$  hours  
118 per trial; **Table S1**). On average, we inferred that individual mice spent  $4.28 \pm 0.1$  hours per day in the  
119 resource zones though we inferred a wide range of zone occupancy times from 12.2 seconds to 19.2  
120 hours in a given day across all mouse days.  
121

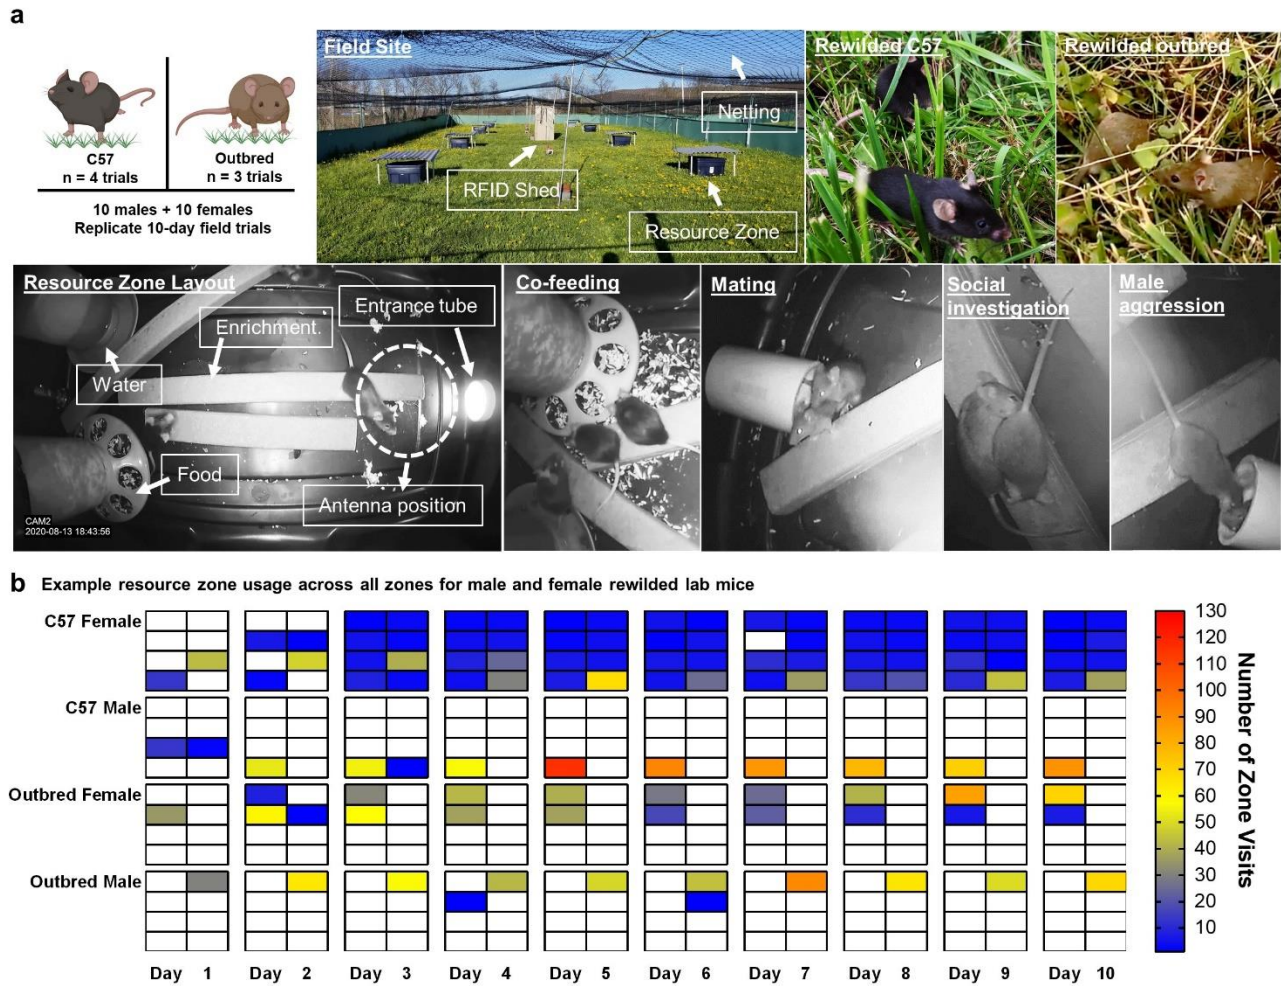

**Figure 1: Field site and study design. (a)** Experimental design for replicate populations of C57 and outbred mice in field enclosures. Photos demonstrate the layout of the field enclosures and the eight resource zones arranged in a 2x4 grid pattern. Resource zones had a single entrance tube and food and water towers provisioned *ad libitum*. A variety of behaviors were observed in the resource zones including co-feeding between females, mating and courtship, social investigation, and male-directed aggression towards intruders. Mouse schematics were created with BioRender. **(b)** Schematic of the resource zone locations (colored boxes) within the field enclosures (2x4 grids) showing typical patterns of zone visitation for four typical animals (rows) representing each sex and genotype across 10 days of activity (columns). White boxes show resource zones that mouse did not visit on that day of the trial.



### 123 ***Spatial structure of rewilded C57 and outbred mice***

124 We first examined how mice utilized the space within the enclosures over the course of the 10-day  
125 trials. C57 females showed strikingly different space and movement patterns across several measures,  
126 as compared to C57 males, outbred males, and outbred females (**Fig. 1b**).

127 We estimated the minimum distance traveled per day for each mouse based on the distance  
128 and number of transitions made between distinct resource zones. Across sexes and genotypes, mice  
129 increased their daily distance travelled within the enclosure as a trial progressed ( $F_{1,139.69} = 54.25$ ,  $P <$   
130  $0.0001$ ; **Fig. 2a**), but overall C57 females travelled much further than all the other groups over the  
131 course of the entire trial ( $P < 0.01$  for all comparisons; **Fig. S2a**). C57 females resembled other groups  
132 for the first few days, but then dramatically increased and maintained their greater minimum  
133 estimated travel distance relative to other groups starting on the fourth day of the trials ( $P < 0.05$  for  
134 daily LMM model contrast estimates for Day 4 – 10; **Fig. 2a**).

135 C57 female travel was not limited to a few resource zones, but instead was widespread across  
136 the enclosure space. Across sexes and genotypes, mice visited an average of  $2.34 \pm 0.05$  resource zones  
137 per day over the course of the trial, though patterns of zone visits varied over time and among  
138 individuals. The number of unique resource zones visited per individual per day was significantly  
139 influenced by time in the trial ( $F_{1,133.29} = 30.65$ ,  $P < 0.001$ ), but this increase was driven entirely by the  
140 behavior of C57 females ( $P = 0.31$  for non-C57 females; **Fig. 2b**). Although all mice explored an  
141 equivalently low number of resource zones during the first several days in the enclosure, by the fourth  
142 day C57 females had significantly increased exploration of the available zones compared to all other  
143 groups ( $P < 0.05$  for daily LMM contrast estimates for Day 4 – 10), which did not differ in their extent of  
144 space use.

145 In addition to visiting more unique zones on average per day, C57 females visited a greater  
146 proportion of all possible zones over the course of the trial (**Fig. 2c**). By the final day of the trial C57  
147 females had visited  $6.27 \pm 0.43$  of the available zones, which is more than C57 males ( $4.29 \pm 0.42$ ;  $t_{125.11}$   
148  $= -5.43$ ,  $P < 0.0001$ ), outbred females ( $4.1 \pm 0.49$ ;  $t_{7.56} = -3.33$ ,  $P = 0.011$ ), and outbred males ( $3.46 \pm$   
149  $0.49$ ;  $t_{125.11} = 2.40$ ,  $P = 0.017$ ). Substantially more C57 females (44%, 17/38) visited all 8 resource zones  
150 compared to C57 males (7.69%, 3/39), outbred females (3.44%, 1/29), and outbred males (3.57%,  
151 1/28) (generalized LMM:  $P < 0.05$  for all comparisons).

152 These differences in the number of zones visited each day and cumulatively across the trial  
153 were not the result of C57 females spending more time in resource zones ( $P > 0.15$  for sex and  
154 genotype main effects; **Fig. S2b**). Rather, C57 females displayed reduced fidelity to their most visited  
155 resource zone compared to other groups. Most individuals tended to favor a single resource zone, but  
156 C57 females show a much weaker bias towards spending time in their most occupied zone relative to  
157 males and outbred females ( $P < 0.05$  for all comparisons; **Fig. 2d**).

158 Given that mice tended to prefer one zone, we next examined how mice established and  
159 maintained priority access to resource zones. We calculated a daily resource zone Priority Access Score  
160 (PAS) per mouse based on the duration of time a mouse spent in a zone relative to all other same-sex

161 individuals and examined how this score changed over time (**Fig. S2c-d**). Briefly, mice gained 1 point for  
162 each resource zone they fully monopolized or a fraction of a point for partial monopoly. Mice that  
163 failed to monopolize any zone (< 50%) were give a -1 penalty (see Methods for full description). Thus,  
164 for the 10-day trials reported here, strongly positive scores (near +10) indicate an individual  
165 consistently excluded others of the same sex from a single resource zone while strongly negative  
166 scores (near -10) indicate an individual was consistently excluded from most spaces. Very high scores  
167 (>>10) indicate individuals monopolized more than 1 zone. Scores closer to zero indicate individuals  
168 that share spaces to some extent with others of the same sex. Overall, females vary widely in the  
169 extent to which they establish and maintain priority access over resource zones such that the  
170 distribution of female PAS values were unimodal and centered near zero for both genotypes by the  
171 final day of the trial (**Fig. 2e**). Males, in contrast, settled into a largely bimodal population of males with  
172 high and low PAS values, demonstrating the presence of territorial males and males who failed to  
173 establish a territory within the population (**Fig. 2f**). Thus, for both genotypes our trial design reliably  
174 generates territorial behavior consistent with studies of wild house mice at similar densities.  
175  
176

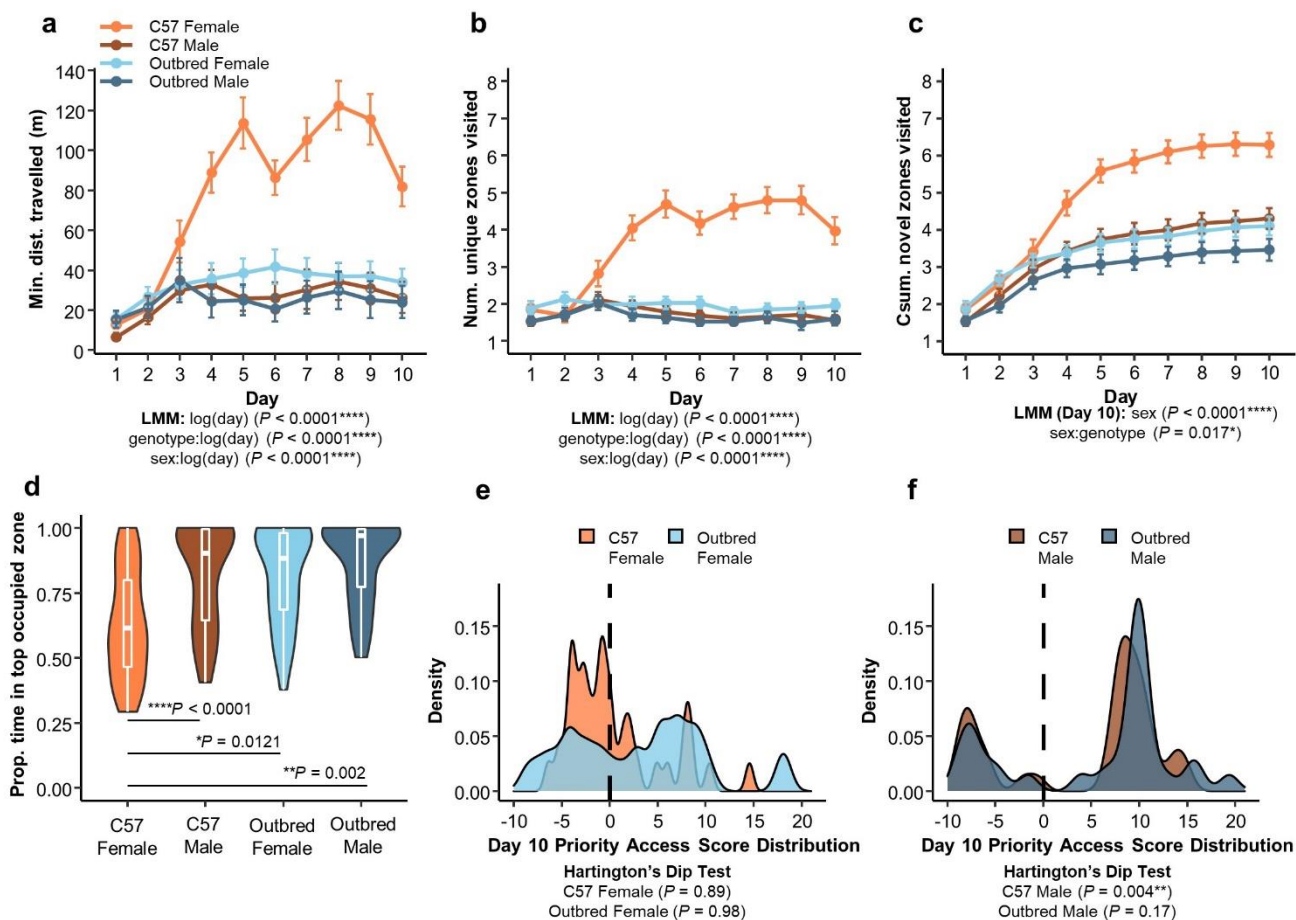

**Figure 2: Spatial structure of rewilded C57 and outbred lab mice.** C57 female mice differed from C57 males and outbred males and females on several metrics including **(a)** the estimated minimum distance travelled per day, **(b)** the number of resource zones visited per day, and **(c)** the cumulative number of novel zones visited over the entire trial period. **(d)** Proportion of the total time a mouse was observed across all zones spent in a mouse's top occupied zone (resource zones rank ordered by mouse occupancy time). **(e-f)** Distributions of cumulative Priority Access Scores after 10 days for female **(e)** and male **(f)** mice. Higher scores indicate the extent to which a mouse maintained majority access over one or more resource zones relative to same-sex conspecific competitors (see Methods).



## 178 **Genotypes and sexes differ in the extent and nature of social interactions**

179 We next examined how mice overlapped in space and time to determine to what extent individuals  
180 interact socially as well as the range of group compositions that arose. For each trial we estimated the  
181 time spent in each of the 120 possible combinations of the 10 males and 10 females in the experiment  
182 (**Fig. 3a**). We inferred individuals were simultaneously present in a resource zone whenever estimated  
183 visitation bout durations directly overlapped with other mice.

184 Most of the time that mice spent in resource zones was spent alone (range 56-87% solitary  
185 mouse time per trial; **Fig. 3a**), but the proportion of time that individuals spent alone was strongly  
186 predicted by sex and genotype. On average, males spent a greater proportion of recorded time in  
187 resource zones alone than females ( $F_{1,126} = 56.5$ ,  $P < 0.0001$ ; **Fig. 3b**). Indeed, we frequently observed  
188 males sitting in the resource zones oriented toward the entrance seemingly waiting for other mice to  
189 visit (**Video S1**). Outbred mice were more likely to be alone in the zones than C57 mice ( $F_{1,5} = 48.51$ ,  $P =$   
190  $0.0009$ ; **Fig. 3b**). Overall, outbred males were especially likely to spend time alone compared to other  
191 individuals; all of them (29/29) spent more than 50% of their total recorded time alone. In comparison  
192 77% of outbred females (23/30), 75% of C57 males (30/40), and only 18% of C57 females (7/40) spent  
193 the majority of their recorded time alone. Given the interest in the biology of social isolation in mice<sup>55-</sup>  
194 <sup>59</sup>, it is notable that when given the opportunity to freely interact, many mice opted instead to spend a  
195 significant portion of their time alone over the course of their trial.

196 Though individuals spend a large portion of their time in the resource zones by themselves, we  
197 estimated more than 1500 mouse hours of social interactions across the seven trials, defined as time  
198 with two or more mice in the zone. Dyadic interactions accounted for the majority of estimated social  
199 interaction time in both genotypes (75.3% in C57, 87.1% in outbred), though larger aggregations of  
200 mice were also detected in all trials (**Fig. 3a**). On average, females spent a greater portion of their  
201 recorded time in social groups than males, both in terms of mixed-sex ( $F_{1,126.05} = 31.84$ ,  $P < 0.0001$ ; **Fig.**  
202 **S3a**) and same-sex groups ( $F_{1,126.18} = 25.85$ ,  $P < 0.0001$ ; **Fig. S3b**). Compared to outbred mice, C57 mice  
203 were more likely to be engaged in both mixed-sex ( $F_{1,4.99} = 33.27$ ,  $P = 0.002$ ; **Fig. S3a**) or same-sex  
204 groups ( $F_{1,5.14} = 15.19$ ,  $P = 0.011$ ; **Fig. S3b**). Most mice (75.6%,  $n = 102/135$ ) spent >50% of their  
205 recorded social time in mixed sex groups. The relative proportion of social time in same-sex versus  
206 mixed-sex groups did not differ between sexes or genotypes ( $P > 0.67$ ; **Fig. 3c**).

207 Compared to females, males showed a notably wider range of relative time spent in mixed sex  
208 groups (**Fig. 3c**). The proportion of social time in mixed versus same-sex social interactions among  
209 males is inversely correlated with their resource zone Priority Access Score rank within their trial ( $F_{1,$   
210  $56.77} = 46.72$ ,  $P < 0.0001$ ; **Fig. 3d**). That is, males that monopolize resource zones spend relatively more  
211 of their social time with females compared to males that failed to gain priority access to resource  
212 zones, consistent with hypothesized benefits of territoriality<sup>60-62</sup>. The slope of the relationship differed  
213 significantly between genotypes, with outbred males showing a steeper relationship between Priority  
214 Access Score rank and time spent with females ( $F_{1, 56.8} = 7.23$ ,  $P = 0.0094$ ; **Fig. 3d**), suggesting that the  
215 benefits of territoriality are especially strong among outbred mice.

216 We next investigated how long individuals tended to interact with each other in social grouping  
217 events across the course of the trial. Most interactions tended to be relatively brief and became  
218 shorter in duration over the course of the trials (**Fig. 3e** and **Fig. S3c-d**). The length of mixed-sex  
219 interactions was shorter and decreased more strongly over time in outbred mice (genotype:  $F_{1, 7.1} =$   
220  $15.343$ ,  $P = 0.006$ ; genotype:time interaction:  $F_{1, 19722} = 24.19$ ,  $P < 0.0001$ ; **Fig. S3c**). The length of same-  
221 sex interactions also decreased over time for both female-female ( $F_{1, 9152} = 124.26$ ,  $P < 0.0001$ ; **Fig. S3d**)  
222 and male-male ( $F_{1, 1862} = 43.9$ ,  $P < 0.0001$ ; **Fig. 3e**) interactions. This decline was especially stark for  
223 males, who rarely interacted after territories were established during the first few days (**Fig. 3e**).  
224 Overall, male-male interactions were briefer in outbred compared to C57 males ( $F_{1, 21.65} = 6.42$ ,  $P =$   
225  $0.019$ ). Half of all time spent in male-male interactions by outbred males had elapsed within the first  
226 ~30 minutes of the trials, showing the remarkably quick deterioration of social relationships among  
227 cage mates once they were placed outside. The frequency of detected interactions also varied over the  
228 course of the trials, with male-male interactions becoming especially sparse after the first few days of  
229 the trials after territories had been established (**Fig. 3e**). The increasingly sparse and very brief  
230 interaction among males reflect the territoriality dynamics of males in these trials, which readily chase  
231 other males away from their monopolized zones (**Video S1**).

232

233

234

235

**a** Relative time engaged in different interaction types

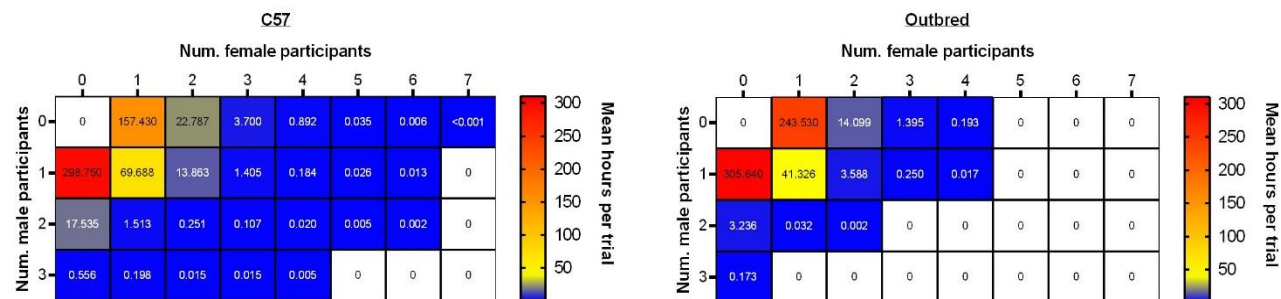

**b**

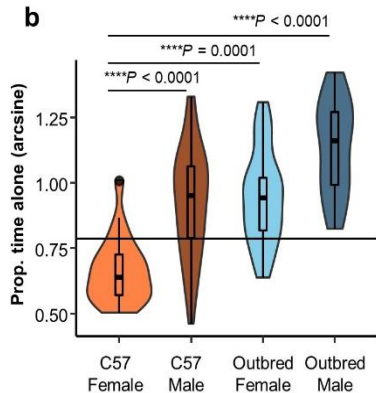

**c**

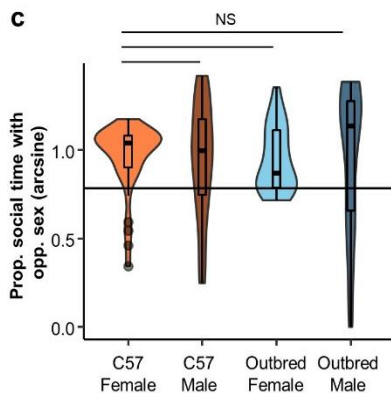

**d**

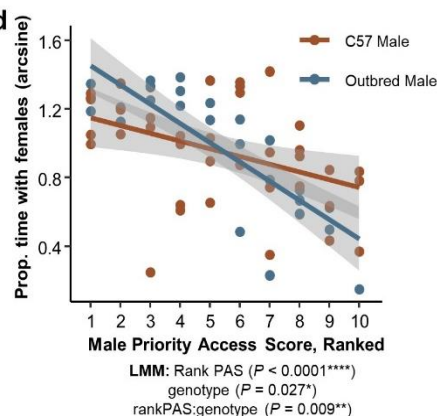

**e**

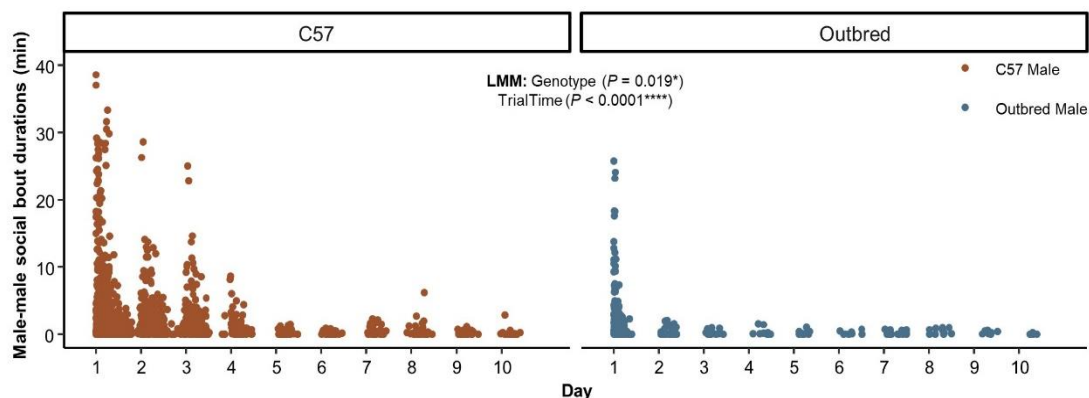

**Figure 3: Social interactions and group compositions of rewilded mice. (a)** Contour plot of average duration of trial time spent in different male and female group compositions. Only realized group compositions are shown across the two trials. **(b)** Proportion of observed time spent alone. The horizontal line represents the arcsine transformed 50% level. **(c)** Proportion of social time spent in groups with at least one member of the opposite sex. The horizontal line represents the arcsine transformed 50% level. **(d)** Relationship between the proportion of social time males spent in mixed sex groups and his ranked Priority Access Score on Day 10 (cumulative sum of all daily PAS values) for C57s ( $R = -0.41$ ) and outbred ( $R = -0.81$ ) males. **(e)** Male-male social grouping events were shorter and less frequent in outbred mice compared to C57 mice. For visualization purposes, the y-axis is cut off at 40 min (a small number of long interactions are inferred very early in the trial after mice are initially placed into resource bins,  $n = 1,865$  events shown out of 1,872 total events).

### 237 **Distinct social networks emerge between C57 and outbred mice**

238 To investigate the emergent group structure of both genotypes, we analyzed the total and daily  
239 networks formed for each trial. Overall, C57 mice formed more connected networks than outbred  
240 mice, a difference which was largely driven by high levels of C57 female sociability (**Fig. 4a-b**). Outbred  
241 networks increased in the number of graph components – the portions of the network disconnected  
242 from each other – over time (genotype:log(day),  $F_{1,61} = 17.02$ ,  $P < 0.001$ ; **Fig. S4a**), reflecting the demic  
243 structure reported for many wild mouse populations<sup>23,63,64</sup>. Over time, the network edge density – a  
244 measure of the proportion of edges actually observed out of all possible edges in the network –  
245 increased in C57 social networks, but not in outbred networks (genotype:log(day),  $F_{1,61}$ ,  $P < 0.0001$ ; **Fig.**  
246 **S4b**).

247 Females of both genotypes had high degree centrality measures compared to their respective  
248 males, indicating females form key connections within mouse social networks. There was a significant  
249 three-way interaction between sex, genotype, and time, such that C57 females rapidly increased their  
250 network centrality measures compared to all other sex and genotype combinations  
251 (genotype:sex:log(day),  $F_{1,133.83} = 6.66$ ,  $P = 0.011$ ; **Fig. 4c**). Thus, many of the differences we see in  
252 social networks between the genotypes is driven by the propensity of C57 females to engage socially  
253 with many distinct individuals.

254 Social networks as a whole can be more or less centralized as a function of the individual node-  
255 level centrality measures, with more centralized networks having shorter distances on average  
256 between individuals. We examined the graph-level eigenvector centrality between C57 and outbred  
257 networks and found a significant interaction between genotype and time in the trial ( $F_{1,61} = 17.02$ ,  $P =$   
258  $0.0001$ ; **Fig. S4c**). In other words, C57 networks gradually rose in their level of centralization over time  
259 while outbred networks stayed relatively constant. By the final day of the trial, C57 mice met many  
260 more of the available social partners present in the enclosures as compared to outbred mice  
261 (genotype:  $F_{1,5} = 12.16$ ,  $P = 0.017$ ; **Fig. 4d**), who failed, on average, to ever meet more than 50% of the  
262 potential social partners. Intriguingly, females of both genotypes showed high levels of vertex page  
263 rank scores, indicating that information flow through the network is more likely to move through  
264 females than males (sex:genotype:log(day):  $F_{1,132.01} = 5.33$ ,  $P = 0.023$ ; **Fig. 4e**).

265 Finally, we analyzed the extent to which social networks for each day of the trial predicted the  
266 social network structure on the final day of the trial. We found that outbred social networks were  
267 much more stable over time compared to C57 networks. For every outbred trial, the social network on  
268 the first day of the trial – and every day thereafter – was strongly predictive of the final realized social  
269 structure on Day 10 (MRQAP test,  $P < 0.0001$ , Bonferroni correction; **Fig. 4f**). In contrast, no C57 trial  
270 social network on Day 1 was strongly associated with the final network structure, and three out of four  
271 trials did not significantly predict the final social network until Day 5 of the trial.

272

273

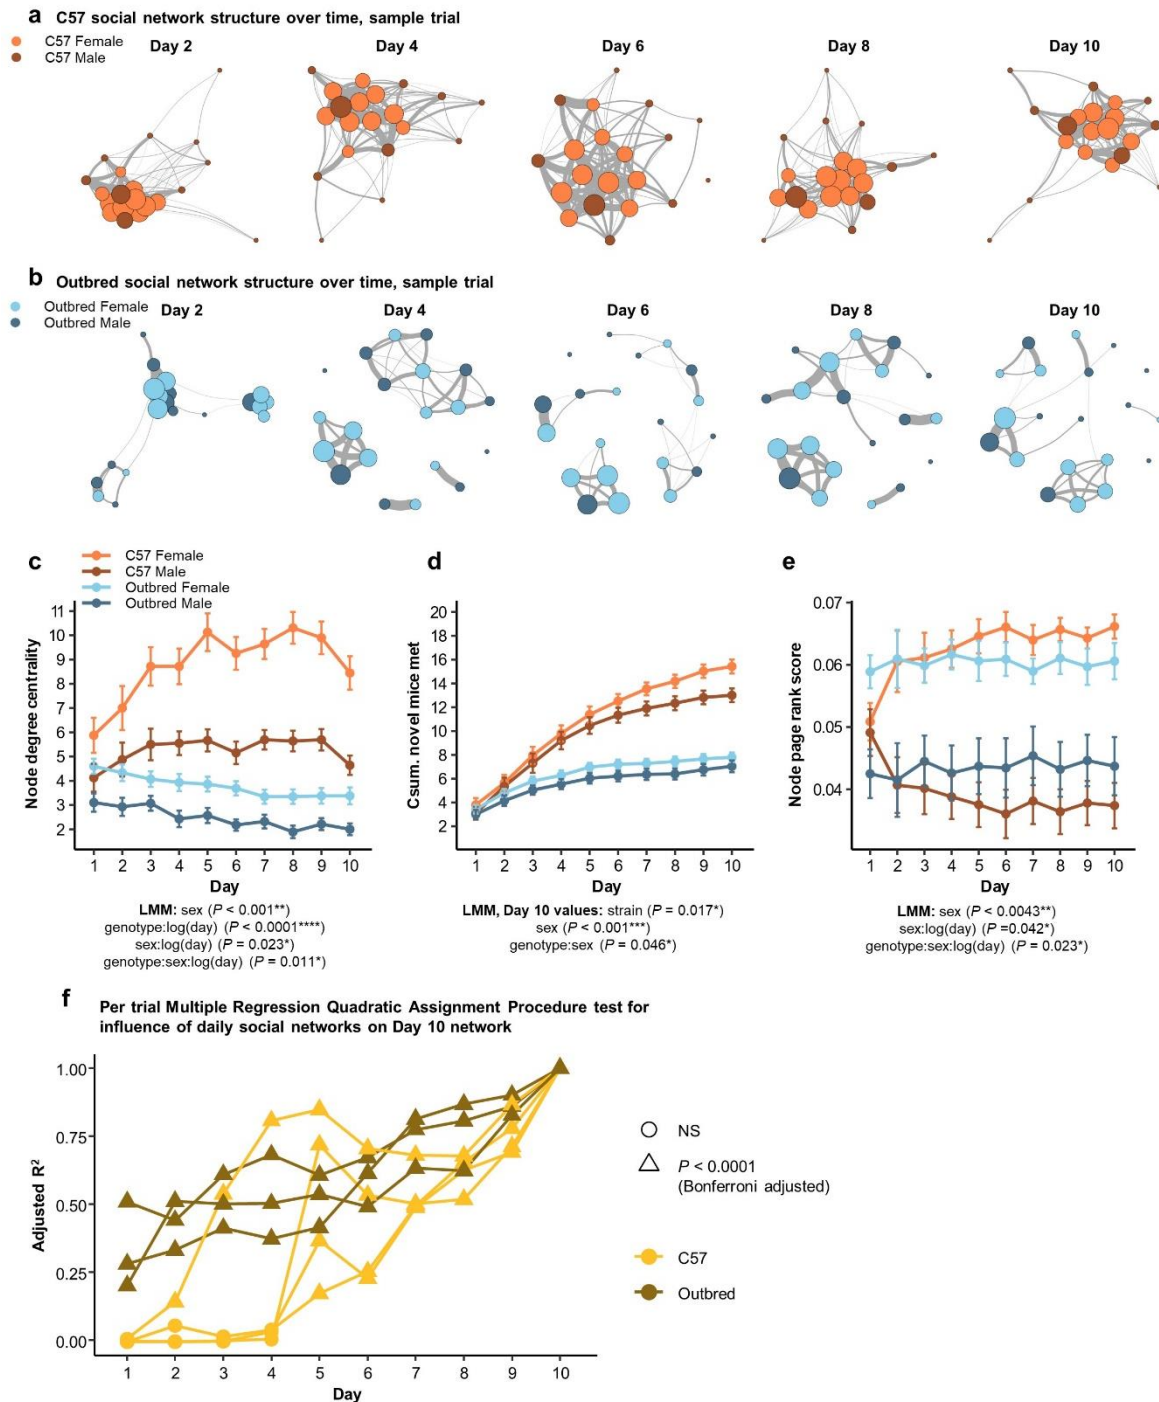

**Figure 4: Social network structure of rewilded lab mice. (a-b)** Daily social networks from an example C57 trial **(a)** demonstrates a typical pattern of persistently high female interconnectivity while an example outbred trial **(b)** demonstrates increasing network modularity over time. The size of connections between nodes represents the edge weight. Node sizes reflect the node edge strength, or the sum of all edge weights for a single node. **(c)** Node degree centrality over time show significant strain and sex interaction effects, with females of both strains having higher network centrality scores than males. **(d)** C57 mice met a majority of the available novel social partners by the final day of the trial, while outbred mice did not. **(e)** Both C57 and outbred females exhibited high page rank scores relative to males of either genotype, indicating that females serve as major conduits of information flow through the networks. **(f)** Outbred networks on each day of every trial are highly predictive of the final network structure on Day 10. C57 social networks are slower to stabilize.



## 275 DISCUSSION

276 Our replicated field experiments demonstrate that C57 lab mice broadly recapitulate the behaviors of  
277 wild-derived mice in free living conditions but have different emergent social structure largely due to  
278 females being more exploratory. The organization of mammal societies is influenced by ecological<sup>65-67</sup>,  
279 demographic<sup>68-71</sup>, and phylogenetic factors<sup>72-74</sup>. Our experiment controlled resource distribution and  
280 demographic composition of mice across trials. Thus, these data show that genotype can have a strong  
281 effect on social structures in mammals<sup>75,76</sup>. These data also highlight the flexibility of mouse social  
282 behaviors across diverse ecological and demographic conditions. For example, in contrast to lab studies  
283 at high density, which identify dominance hierarchies among males<sup>18,19,77</sup>, the males in our lower  
284 density populations consistently formed and defended territories (**Fig. 2**). While our experiment only  
285 examined one set of ecological and demographic conditions, it demonstrates an approach in which  
286 variables including food resources, defensibility of spaces, and demographic compositions are all easily  
287 tunable.

288       What drives the difference that we saw in female space use across our trials (**Fig. 2**)? Space use  
289 in female mammals is often predicted by intra-sexual competition for food resources and nest sites<sup>78</sup>,  
290 but resource availability and population density were identical across trials in our study. This suggests  
291 either that there is an innate difference in behavior between C57 and wild-derived females and/or that  
292 they respond differently to the social conditions present in our trials. In feral house mice, infanticide  
293 risk from both male and female conspecifics is thought to be a major driver of social behavior in  
294 females<sup>79-81</sup>. As a result, wild female house mice will aggressively defend space from other females<sup>38-</sup>  
295 <sup>41,82</sup>. C57 mice have been domesticated to live in cages at high densities, especially among females,  
296 and this is associated with lower female aggression compared to wild mouse genotypes<sup>42</sup>. Differences  
297 in relative tolerance of other females may be a key driver of the observed differences in social  
298 organization between C57 and outbred females in this study. An additional explanation for the  
299 behavior in C57 females may stem from the interactions of males and females in the trials. In the trials  
300 reported here, C57 females interact with C57 males while outbred females interacted with outbred  
301 males. Thus, male genotype could conceivably drive differences in patterns of female behavior. As one  
302 example, consider how genetic diversity among males in a trial may influence behavior. Whereas  
303 individuals in the outbred trials are genetically heterogenous and distinct, all the C57 mice are  
304 (essentially) genetically identical. Female mice respond to variation in perceived relatedness between  
305 themselves and males<sup>33,83,84</sup> and could potentially attend to how they perceive males to be related to  
306 each other. Understanding how innate behavioral differences among genotypes versus emergent  
307 properties generated by social interactions work together to shape mammalian societies is an exciting  
308 future direction that can be addressed with rewilded mouse studies.

309       Male space use in rodents and other mammals is frequently linked to patterns of female space  
310 use<sup>78,81</sup>. Yet despite differing patterns of female space use between genotypes, the male spatial and  
311 social structures were very similar, highlighting that some aspects of social organization are relatively  
312 less sensitive to other features of a population's socioecology. Perhaps one of the most striking



313 features of our study is the speed in which male-male social interactions deteriorate and decrease in  
314 frequency, especially among outbred males (**Fig. 3e**). Previous studies of wild mouse behavior have  
315 reported males will defend territories and attempt to monopolize spaces and exclude other males<sup>25,29</sup>.  
316 Though in low complexity environments or at high densities males may form dominance  
317 hierarchies<sup>19,25</sup>. The formation and consequences of dominance hierarchies among male mice have  
318 been the subject of recent study in the lab<sup>19,77,85</sup>, though our results suggest that when given ample  
319 and defensible spaces male mice will tend to avoid interacting with others and form individual  
320 territories rather than a dominance hierarchy. The flexibility of house mouse social structure under  
321 different conditions has undoubtedly been important for their ecological success across diverse  
322 commensal and natural environments<sup>20,23,86,87</sup>.

323 We identified not only consistent average differences in the behavior of individuals between  
324 genotypes but also differences in the higher-level social organizations of C57 lab mice and their wild-  
325 derived outbred counterparts (**Fig. 4**). Studies of social structures tend to come from idiosyncratic  
326 populations living in the wild, meaning that studies of social behavior in natural conditions are rarely  
327 replicated<sup>52,88,89</sup>. Studies of free-living populations are critically important, but this non-replicability  
328 makes understanding the specific genetic, neurobiological, ecological, and demographic factors  
329 influencing complex behavior challenging. The repeatability of social organization demonstrated here  
330 suggests that future work manipulating aspects of physiology or neural function in rewilded mice will  
331 offer a unique opportunity to study not just differences in individual behavior, but also how those  
332 behaviors reliably influence society.

333

#### 334 ***Consent for Publication***

335 All authors have read and approved this manuscript for publication.

336

#### 337 ***Acknowledgments***

338 We thank Melissa R. Warden for helpful discussions during the planning of the experiment. We thank  
339 Gary Olz and Russel L. Ligon for assistance in preparing the field site. Funding was provided by Cornell  
340 University (Neurobiology and Behavior Departmental Grant to CCV), the USDA (Hatch Grant, NYC-  
341 191428 to MJS), and the NIH (R35 GM138284 to AHM).

342

#### 343 ***Author contributions***

344 1) Conceptualization, 2) Study Design, 3) Methodology Design, 4) Field Work, 5) Data Curation & Code,  
345 6) Data Analysis, 7) Figure Creation, 8) Writing – Original Draft, 9) Writing – Review & Editing, 10)  
346 Supervision, 11) Funding Acquisition. CCV: 1,2,3,4,5,6,7,8,9,10,11. MNZ: 6,9. DDS: 4,9. CHM: 4,9. SHH:  
347 6. MA: 6. AMG: 6. MC: 4. AJM: 4,9,10,11. MJS: 1,2,4,6,7,8,9,10,11.

348

### 349 **Data Availability**

350 All data, statistical outputs, and R code for recreating figures and analyses are available on Zenodo  
351 (<https://doi.org/10.5281/zenodo.6425497>).

352

### 353 **METHODS**

#### 354 **Ethical statement**

355 All procedures conformed to guidelines established by the U.S. National Institutes of Health and have  
356 been approved by the Cornell University Institutional Animal Care and Use committee (IACUC: Protocol  
357 #2015-0060).

358

#### 359 **Animals**

360 We examined two genotypes of *M. m. domesticus*, C57BL/6J (C57) and wild-derived outbred mice. C57  
361 mice were obtained from The Jackson Laboratory (Bar Harbor, Maine, USA). Outbred mice were  
362 derived from strains generated through distinct initial pairings of wild mice from Saratoga Springs, NY,  
363 USA, trapped by M.J.S in 2013. These mice are genetically related to The Jackson Laboratory wild-  
364 derived mouse strains SarA/NachJ (#035346), SarB/NachJ (#035347), and SarC/NachJ (#035348) mice  
365 which are descended from the same wild caught group of mice.

366

#### 367 **Study design and field site description**

368 All field work was conducted at Cornell University's Liddell Laboratory Field Station in Dryden, New  
369 York, USA from May 2020 to August 2020. Male (n = 10 per trial) and female (n = 10 per trial) mice  
370 were released into 0.056 hectare (38.1 m x 15.24 m) enclosures for 10-day observation periods before  
371 they were recovered using live-trapping methods (C57 trials: n = 4; outbred trials: n = 3). The walls of  
372 the enclosures were made from sheet metal and stood approximately 4 feet tall and extended 4 feet  
373 into the ground to prevent the mice from tunneling and moving between the enclosures. Each  
374 enclosure was covered with netting to prevent aerial predation, and loose gravel was spread along the  
375 interior perimeter of each enclosure to discourage digging near the walls. Three days prior to releasing  
376 mice into the enclosures, we trapped in and around the enclosures to capture and remove any small  
377 mammals or snakes from the enclosure. The enclosures contained a mixture of local perennial grasses  
378 and plant communities which were mowed to a height of ~5 cm prior at the start of each trial.

379 Each enclosure contained eight identical resource zones constructed of PVC and 32-gallon  
380 storage totes (Rubbermaid, USA) arranged in a two by four grid pattern. Resource zones were covered  
381 with waterproof corrugated roofing material attached to a polyvinyl chloride (PVC) frame. Resource  
382 zones had a single PVC entrance tube (50mm diameter) through which the mice could freely enter or  
383 exit the tub. Each resource zone contained feeder towers containing food and water in excess (~50  
384 grams of sunflower seed and 2 liters of water). Several pieces of plastic lumber were added to provide  
385 environmental complexity and vantage points for the mice. The interior of each resource zone was  
386 monitored by a single motion-activated infrared camera with a 180-degree field of view (HD-Q3, CCTV

387 Camera Pros, Lantana, FL, USA) connected to a central DVR unit for file storage and data offloading.  
388 Additionally, each resource zone was equipped with a 15 cm RFID antenna connected to a centralized  
389 data acquisition unit (BioMark, Small Scale System, Boise, ID, USA). Antennas were placed directly  
390 beneath the floor adjacent to the PVC zone entrance tubes to increase the likelihood of capturing  
391 mouse entrances and exits from the resource zone. Scanning for RFID tags within the antenna range  
392 occurred at approximately 2-3 Hz continuously for 10 days. At least 24 hours prior to release in the  
393 enclosures, all subjects were placed into a stereotaxic frame (Kopf Instruments, Tuhunga, CA, USA) and  
394 briefly anesthetized with isoflurane (3-5%). Mice were subcutaneously implanted with dual RFID tags  
395 (BioMark, Boise, ID, USA) in the dorsal flank and periscapular region.

396 At the conclusion of the 10-day observation period, the resource zone entrance tubes were  
397 blocked and >50 live-catch traps (H.B. Sherman, Tallahassee, FL, USA) baited with sunflower seeds and  
398 a moistened cotton ball were placed in a grid pattern in the enclosures in the evening (20:00-22:00  
399 hours) and were checked for occupancy the following morning (07:00-09:00 hours). Trapping  
400 continued until all the mice were recovered or identified as deceased or missing (a conclusion reached  
401 if there were no RFID reads in the enclosure for a 24-hour period after 3 days of trapping). The trap  
402 locations were recorded, and the individual identities of the mice were confirmed using a handheld  
403 RFID reader (BioMark, HPR Lite).

404

#### 405 ***RFID data analysis and zone visit estimation***

406 We examined the time elapsed between consecutive RFID detection events for each mouse within  
407 each resource zone (the RFID inter-read interval). We found that the distribution of all RFID inter-read  
408 intervals was heavily skewed (min = 1s, median = 1s, mean = 16.4s, max = 32,683s). We grouped RFID  
409 reads into zone visitation bouts using a 153 second (the cut-off for capturing 99% of all the mouse  
410 inter-read interval values) sliding window method. Based on visual observations of the resource zones  
411 and on RFID data, we omitted a subset of animals from a subset of days for all spatial and social  
412 analyses (see Table S1 for details).

413

#### 414 ***Priority Access Score calculation***

415 Priority access scores were calculated separately for male and female mice within a trial. First, we  
416 calculated the time a given mouse ( $M$ ) occupied a resource zone ( $Z$ ) as a percentage of the total time  
417 that zone was occupied by same-sex conspecifics on a given day ( $D$ ).

418

$$419 \quad \text{Occupancy}_{M,D,Z} = \frac{\text{time}_{M,D,Z}}{\sum_{m=1}^{10} \text{time}_{m,D,Z}}$$

420

421 Next, we calculated a daily Capture Score by summing the Occupancy values for all available zones.

422 Mice that did not have an occupancy value of greater than 0.5 (in other words, a majority share of the

423 time spent in any particular zone), were penalized by subtracting 1 from the final Capture Score. The  
424 penalty indicates that on a given day, a mouse failed to capture any of the zones that mouse visited.  
425

$$426 \quad \text{Capture Score}_{M,D} = \begin{cases} \sum_{z=1}^8 \text{Occupancy}_{M,D,z} - 1 & \text{if } \exists \text{Occupancy}_{M,D,z} < 0.5 \forall z = 1, \dots, 8 \\ \sum_{z=1}^8 \text{Occupancy}_{M,D,z} & \text{otherwise} \end{cases}$$

427  
428 To see how access to zones changed over time, we took the cumulative sum of an individual's Capture  
429 Score ordinally across each day of the trial to derive a final Priority Access Score.

$$430 \quad \text{Priority Access Score}_{M,D} = \sum_{d=1}^D \text{Capture Score}_{M,d}$$

431  
432  
433 As an example, if one male (Male A) occupied a single resource zone every day of the trial for 4 hours a  
434 day, while another male (Male B) accessed only that same zone for 1 hour per day, and the zone was  
435 visited by no other mice, each mouse would yield the following values. Male A's daily Capture Score  
436 would equal 0.8, (because he controlled 4 out of 5 hours), while Male B's daily Capture score would  
437 equal -0.8 (because he controlled 1 out of 5 hours and received a one-point penalty for not controlling  
438 any zones). If this pattern of visitation remained unchanged for all 10 days, then Male A's final PAS  
439 would equal 8, while Male B's PAS would equal -8. Thus, a mouse that is the sole, uncontested  
440 occupant of 3 independent zones (for any length of time) repeatedly over the course of 10 days would  
441 have a daily Capture Score of 3, and a final PAS value of 30. The PAS value thus provides a temporally  
442 evolving measure that captures the dynamics of territory formation, maintenance, and collapse (**Fig.**  
443 **S2c-d**).

#### 444 445 **Social Networks**

446 Weighted networks were derived from a Simple Ratio Index calculation based on binary participation in  
447 spatially and temporally overlapping mouse grouping events in the resource zones using the *asnipe*<sup>90</sup>  
448 package in R 4.1.2 (R Development Core Team). As individuals' social networks may be affected by the  
449 size of the social group, we omitted a subset of individuals who had limited data due to death or loss of  
450 RFID chips<sup>91,92</sup> (see **Table S1**).

#### 451 452 **Statistical Analyses**

453 We built mixed effects models using R 4.1.2 (R Development Core Team) and the R packages *lme4*<sup>93</sup>,  
454 *lmerTest*<sup>94</sup>, and *emmeans*<sup>95</sup> to examine relationships between predictor and response variables. We  
455 included relevant random intercepts and random slopes in our models as appropriate. When main

456 effects or interaction effects achieved statistical significance ( $P < 0.05$ , two-tailed), we performed *post-*  
457 *hoc* univariate ANOVAs. We only report significant main and interaction effects that are critical for data  
458 interpretation from our multifactorial ANOVAs in the Results section. We include the full statistical test  
459 and model outputs in the Supplementary Material. Data cleaning, shaping and summaries were  
460 performed in R. Graphing was performed in R using the package *ggplot2*<sup>96</sup> and in GraphPad Prism 9.3  
461 ([www.graphpad.com](http://www.graphpad.com)). We report all means  $\pm$  standard error measure (SEM), unless otherwise stated,  
462 and consider all values statistically significant when  $P < 0.05$ .  
463

464 **SUPPLEMENTARY FIGURES**

|                                                                                                         | C57 Trials (10 days per trial) |                         |                                                                                                                                |                          | Outbred Trials (10 days per trial)                                                                                                                                              |                          |                          | Total     |
|---------------------------------------------------------------------------------------------------------|--------------------------------|-------------------------|--------------------------------------------------------------------------------------------------------------------------------|--------------------------|---------------------------------------------------------------------------------------------------------------------------------------------------------------------------------|--------------------------|--------------------------|-----------|
|                                                                                                         | Trial 1                        | Trial 2                 | Trial 3                                                                                                                        | Trial 6                  | Trial 4                                                                                                                                                                         | Trial 5                  | Trial 7                  |           |
| <b>Strain</b>                                                                                           | C57                            | C57                     | C57                                                                                                                            | C57                      | Outbred                                                                                                                                                                         | Outbred                  | Outbred                  | -         |
| <b>Enclosure</b>                                                                                        | Bravo                          | Alpha                   | Bravo                                                                                                                          | Alpha                    | Alpha                                                                                                                                                                           | Bravo                    | Bravo                    | -         |
| <b>Trial Dates</b>                                                                                      | 6/19/2020-<br>6/29/2020        | 7/3/2020 -<br>7/13/2020 | 7/3/2020 -<br>7/13/2020                                                                                                        | 8/13/2020 -<br>8/23/2020 | 7/17/2020 -<br>7/27/2020                                                                                                                                                        | 7/17/2020 -<br>7/27/2020 | 8/13/2020 -<br>8/23/2020 | -         |
| <b>Total RFID Reads</b>                                                                                 | 1,387,206                      | 1,435,575               | 903,013                                                                                                                        | 1,052,007                | 1,140,586                                                                                                                                                                       | 1,579,413                | 890,836                  | 8,388,636 |
| <b>Average RFID reads per mouse per night</b>                                                           | 6936                           | 7178                    | 5017                                                                                                                           | 5260                     | 6631                                                                                                                                                                            | 7897                     | 4454                     | -         |
| <b>Total estimated mouse hours spent in resource zones</b>                                              | F: 406.9<br>M: 503.7           | F: 328.9<br>M: 521.9    | F: 328.9<br>M: 521.9                                                                                                           | F: 530.0<br>M: 524.4     | F: 494.4<br>M: 380.6                                                                                                                                                            | F: 284.2<br>M: 526.0     | F: 360.1<br>M: 290.3     | 5833.3    |
| <b>Mice Collected / Released</b>                                                                        | 20 / 20                        | 20 / 20                 | 20 / 20                                                                                                                        | 20 / 20                  | 18 / 20                                                                                                                                                                         | 20 / 20                  | 20 / 20                  |           |
| <b>Triage Details</b><br>C = collected<br>ND = not detected<br>NC = not collected<br>PD = presumed dead | NA                             | NA                      | - Anubis (male) dead on Day 5, C<br>- Rae (female) C, ND Day 2 – 10<br>- Rose (female) ND on Day 10, trapped without RFID tags | NA                       | - Hare (male) ND Day 2 – 10, NC, PD<br>- Isis (female) ND Day 3 – 10, NC, PD<br>- George (male) crosses from Trial 4 to Trial 5 paddock on Day 3, C. Triaged from all analyses. | NA                       | NA                       |           |

465 **Table S1: Summary of trial details.**

466

467



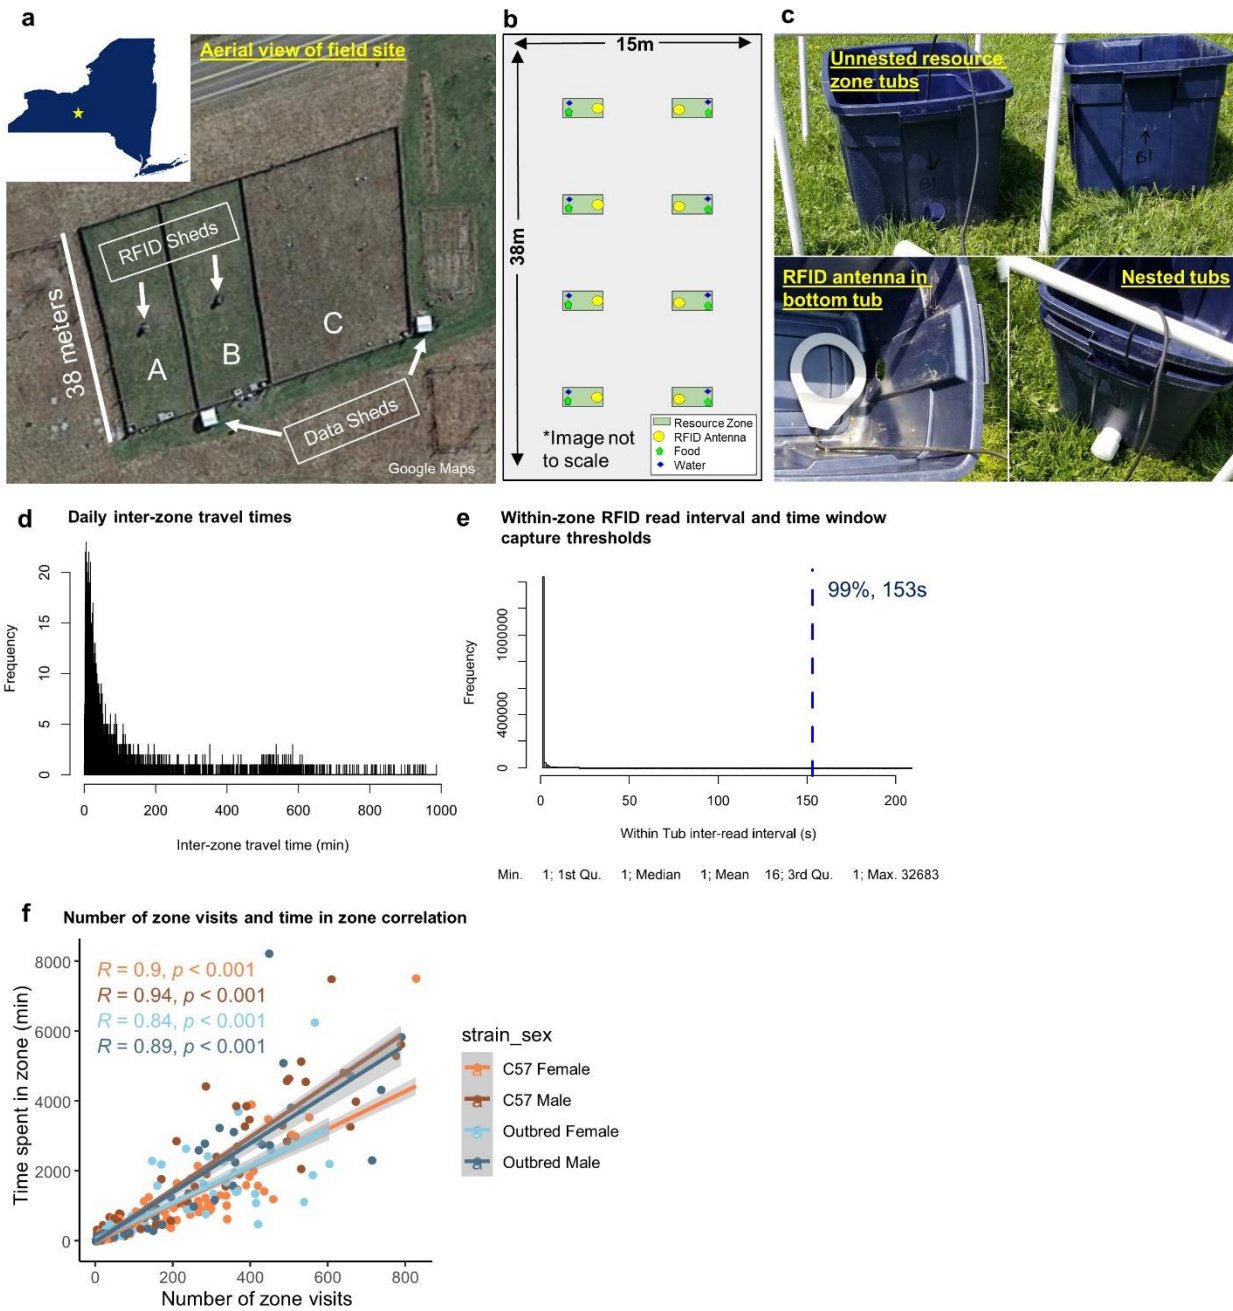

**Figure S1: Field site setup and RFID duration bout window selection. (a)** Satellite image of the field enclosures showing the position of the data sheds housing the security camera system and computer for downloading RFID data from the central RFID sheds. **(b)** Schematic of the Alpha and Bravo enclosures indicating the resource zone layouts. **(c)** RFID monitoring of the resource zones. Two storage totes were nested with a RFID antenna placed between and beneath the entrance tunnel to prevent mice from directly contacting the antenna and wire. **(d)** Histogram of the daily inter-zone travel times for all mice for all days. **(e)** Histogram of the within zone inter- RFID read intervals and the 153 second threshold capturing 99% of all inter-RFID read intervals which was used to group RFID reads into resource zone visitation bouts (see Methods). **(f)** Correlation of estimated duration spent in each zone and the number of visits to that zone for all sex and strain categories.

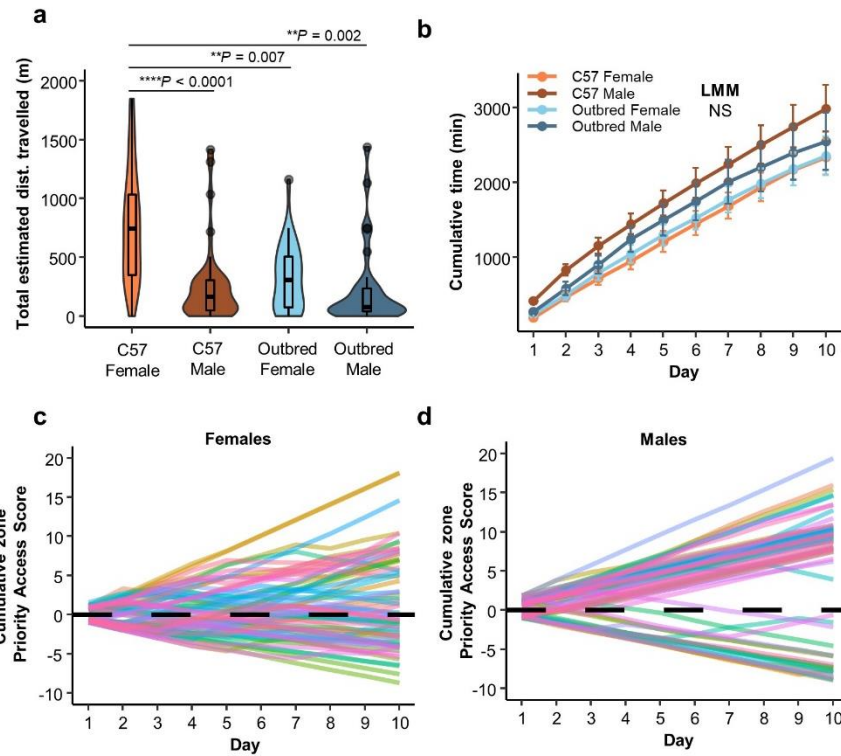

**Figure S2: Estimated time in resource zones and priority access score development. (a)** Total estimated distance travelled across the trial period for all sex and genotype categories. **(b)** Cumulative sum of daily estimated time spent in the resource zones. **(c-d)** Cumulative sum of daily Priority Access scores over 10 days of observation for females **(c)** and males **(d)** of both genotypes (See Methods for additional details on calculation of the daily PAS value).

469  
470  
471  
472  
473

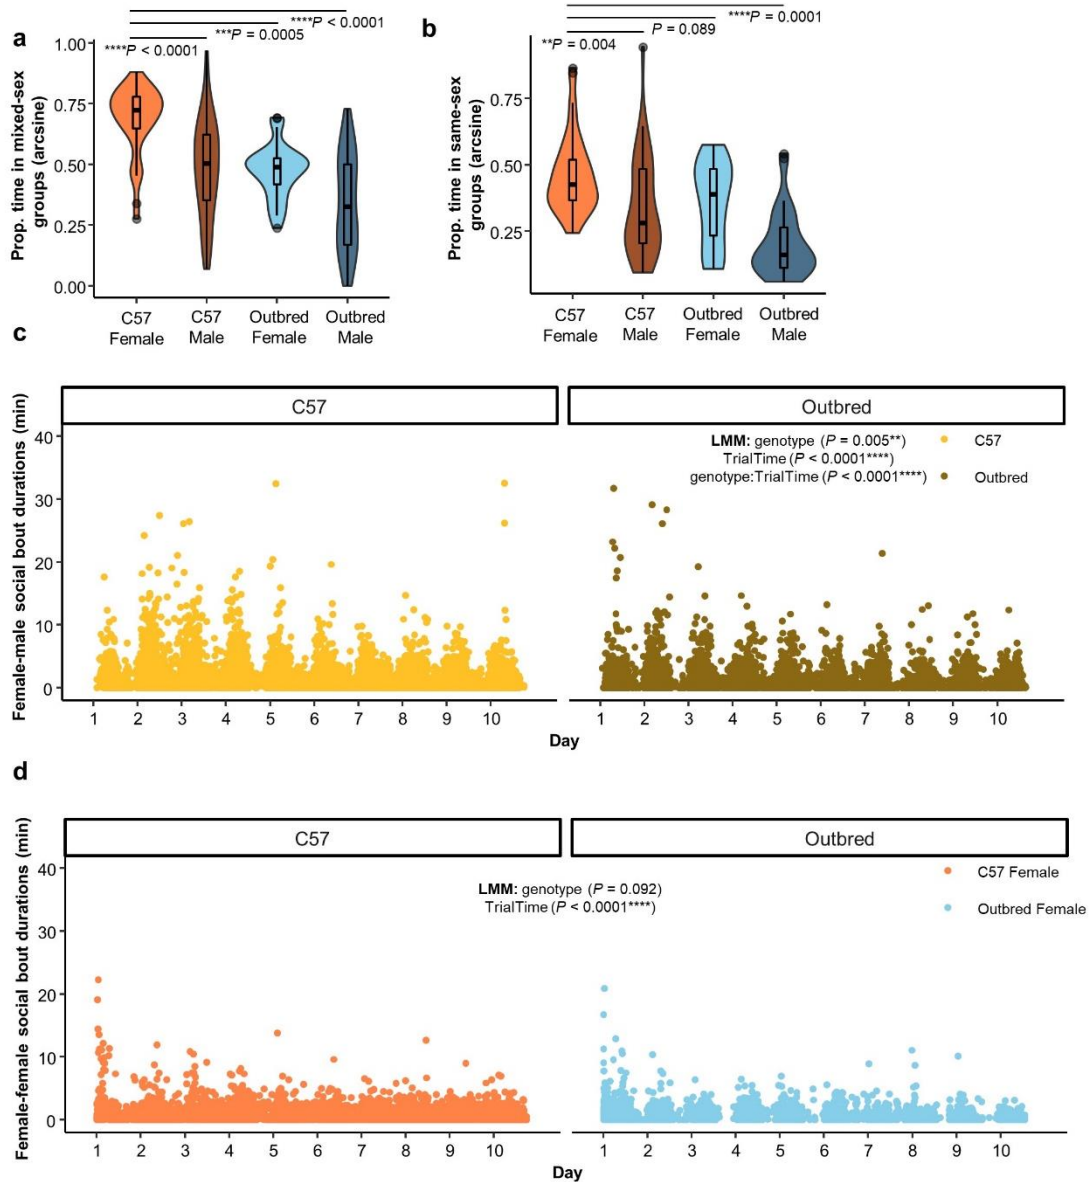

**Figure S3: Sex and genotype social grouping compositions. (a)** Proportion of mouse time spent in mixed sex groups. **(b)** Proportion of time spent in same sex groups. **(c)** Female-male social grouping bout durations over time. For visualization purposes, the y-axis is cut off at 40 (n = 19,736 events shown out of 19,738 total events). **(d)** Female-female social grouping bout durations over time. For visualization purposes, the y-axis is cut off at 40 (n = 9,160 events shown out of 9,161 total events).

475

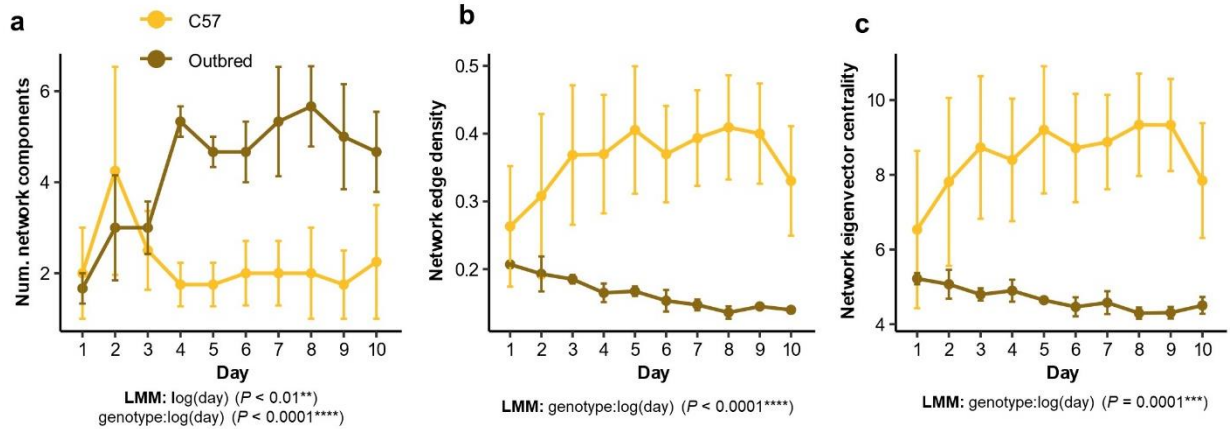

**Figure S4: C57 and outbred social network-level properties over time. (a)** Number of network components increases over time in outbred, but not C57, social networks over time. **(b)** Network edge density increases over time in C57, but not outbred, social networks over time. **(c)** Network eigenvector centrality significantly differs between C57 and outbred networks over time.

476

477

## 478 REFERENCES

- 479 1. Fox, J.G., Barthold, S., Davisson, M., Newcomer, C.E., Quimby, F.W., and Smith, A. (2006). The  
480 mouse in biomedical research: normative biology, husbandry, and models (Elsevier).
- 481 2. Rosenthal, N., and Brown, S. (2007). The mouse ascending: perspectives for human-disease models.  
482 *Nat Cell Biol* 9, 993–999.
- 483 3. Snell, G.D. (1941). *Biology of the laboratory mouse*.
- 484 4. Waterston, R.H., and Pachter, L. (2002). Initial sequencing and comparative analysis of the mouse  
485 genome. *Nature* 420, 520–562.
- 486 5. Paigen, K. (2003). One Hundred Years of Mouse Genetics: An Intellectual History. I. The Classical  
487 Period (1902-1980). *Genetics* 163, 1–7.
- 488 6. Paigen, K. (2003). One Hundred Years of Mouse Genetics: An Intellectual History. II. The  
489 Molecular Revolution (1981-2002). *Genetics* 163, 1227–1235.
- 490 7. Graham, A.L. (2021). Naturalizing mouse models for immunology. *Nat Immunol* 22, 111–117.
- 491 8. Lahvis, G.P. (2017). Unbridle biomedical research from the laboratory cage. *eLife* 6, e27438.
- 492 9. Leonelli, S., and Ankeny, R.A. (2013). What makes a model organism? *Endeavour* 37, 209–212.
- 493 10. Datta, S.R., Anderson, D.J., Branson, K., Perona, P., and Leifer, A. (2019). Computational  
494 Neuroethology: A Call to Action. *Neuron* 104, 11–24.
- 495 11. Dennis, E.J., Hady, A.E., Michaiel, A., Clemens, A., Tervo, D.R.G., Voigts, J., and Datta, S.R.  
496 (2021). Systems Neuroscience of Natural Behaviors in Rodents. *J. Neurosci.* 41, 911–919.
- 497 12. Gomez-Marin, A., Paton, J.J., Kampff, A.R., Costa, R.M., and Mainen, Z.F. (2014). Big behavioral  
498 data: psychology, ethology and the foundations of neuroscience. *Nat Neurosci* 17, 1455–1462.
- 499 13. Krakauer, J.W., Ghazanfar, A.A., Gomez-Marin, A., Maciver, M.A., and Poeppel, D. (2017).  
500 Neuroscience Needs Behavior: Correcting a Reductionist Bias. *Neuron* 93, 480–490.
- 501 14. Laurent, G. (2020). On the value of model diversity in neuroscience. *Nat Rev Neurosci* 21, 395–396.
- 502 15. Pereira, T.D., Shaevitz, J.W., and Murthy, M. (2020). Quantifying behavior to understand the brain.  
503 *Nat Neurosci* 23, 1537–1549.
- 504 16. Zilkha, N., Sofer, Y., Beny, Y., and Kimchi, T. (2016). From classic ethology to modern  
505 neuroethology: Overcoming the three biases in social behavior research. *Current Opinion in*  
506 *Neurobiology*.
- 507 17. Torquet, N., Marti, F., Campart, C., Tolu, S., Nguyen, C., Oberto, V., Benallaoua, M., Naudé, J.,  
508 Didienne, S., Debray, N., et al. (2018). Social interactions impact on the dopaminergic system and  
509 drive individuality. *Nature Communications* 9, 3081.



- 510 18. Weissbrod, A., Shapiro, A., Vasserman, G., Edry, L., Dayan, M., Yitzhaky, A., Hertzberg, L.,  
511 Feinerman, O., and Kimchi, T. (2013). Automated long-term tracking and social behavioural  
512 phenotyping of animal colonies within a semi-natural environment. *Nat Commun* 4, 2018.
- 513 19. Williamson, C.M., Lee, W., and Curley, J.P. (2016). Temporal dynamics of social hierarchy  
514 formation and maintenance in male mice. *Animal Behaviour* 115, 259–272.
- 515 20. Bronson, F.H. (1979). REPRODUCTIVE ECOLOGY OF THE HOUSE MOUSE. *Quarterly*  
516 *Review of Biology* 54, 265–299.
- 517 21. Hurst, J.L. (1987). The functions of urine marking in a free-living population of house mice, *Mus*  
518 *domesticus* Ruddy. *Animal Behaviour* 35, 1433–1442.
- 519 22. König, B., Lindholm, A.K., Lopes, P.C., Dobay, A., Steinert, S., and Buschmann, F.J.-U. (2015). A  
520 system for automatic recording of social behavior in a free-living wild house mouse population.  
521 *Animal Biotelemetry* 3, 39.
- 522 23. Pocock, M.J.O., Searle, J.B., and White, P.C.L. (2004). Adaptations of animals to commensal  
523 habitats: population dynamics of house mice *Mus musculus domesticus* on farms. *Journal of Animal*  
524 *Ecology* 73, 878–888.
- 525 24. Pocock, M.J.O., Hauffe, H.C., and Searle, J.B. (2005). Dispersal in house mice. *Biological Journal*  
526 *of the Linnean Society* 84, 565–583.
- 527 25. Crowcroft, P. (1966). *Mice All Over*.
- 528 26. Crowcroft, P., and Rowe, F.P. (1963). Social Organisation and Territorial Behaviour in the Wild  
529 House Mouse (*Mus musculus* L.). *Proceedings of the Zoological Society of London* 140, 517–531.
- 530 27. Gerlach, G. (1996). Emigration mechanisms in fetal house mice - A laboratory investigation of the  
531 influence of social structure, population density, and aggression. *Behavioral Ecology and*  
532 *Sociobiology* 39, 159–170.
- 533 28. Lidicker, W.Z. (1976). Social Behaviour and Density Regulation in House Mice Living in Large  
534 Enclosures. *Journal of Animal Ecology* 45, 677–697.
- 535 29. Luzynski, K.C., Nicolakis, D., Marconi, M.A., Zala, S.M., Kwak, J., and Penn, D.J. (2021).  
536 Pheromones that correlate with reproductive success in competitive conditions. *Sci Rep* 11, 21970.
- 537 30. Meagher, S., Penn, D.J., and Potts, W.K. (2000). Male–male competition magnifies inbreeding  
538 depression in wild house mice. *PNAS* 97, 3324–3329.
- 539 31. Noyes, R.F., Barrett, G.W., and Taylor, D.H. (1982). Social Structure of Feral House Mouse (*Mus*  
540 *musculus* L.) Populations: Effects of Resource Partitioning. *Behavioral Ecology and Sociobiology*  
541 10, 157–163.
- 542 32. Potts, W.K., Manning, C.J., and Wakeland, E.K. (1991). Mating patterns in seminatural populations  
543 of mice influenced by MHC genotype. *Nature* 352, 619–621.



- 544 33. Sherborne, A.L., Thom, M.D., Paterson, S., Jury, F., Ollier, W.E.R., Stockley, P., Beynon, R.J., and  
545 Hurst, J.L. (2007). The genetic basis of inbreeding avoidance in house mice. *Current Biology* 17,  
546 2061–2066.
- 547 34. Stockley, P., Ramm, S.A., Sherborne, A.L., Thom, M.D., Paterson, S., and Hurst, J.L. (2013).  
548 Baculum morphology predicts reproductive success of male house mice under sexual selection.  
549 *BMC biology* 11, 1–6.
- 550 35. Wolff, R.J. (1985). Mating behaviour and female choice: their relation to social structure in wild  
551 caught House mice (*Mus musculus*) housed in a semi-natural environment. *Journal of Zoology* 207,  
552 43–51.
- 553 36. Crowcroft, P. (1955). Territoriality in Wild House Mice, *Mus musculus* L. *Journal of Mammalogy*  
554 36, 299–301.
- 555 37. Brown, R.Z. (1953). Social Behavior, Reproduction, and Population Changes in the House Mouse  
556 (*Mus musculus* L.). *Ecological Monographs* 23, 218–240.
- 557 38. Palanza, P., Re, L., Mainardi, D., Brain, P.F., and Parmigiani, S. (1996). Male and female  
558 competitive strategies of wild house mice pairs (*Mus musculus domesticus*) confronted with  
559 intruders of different sex and age in artificial territories. *Behaviour* 133, 863–882.
- 560 39. Palanza, P., Della Seta, D., Ferrari, P.F., and Parmigiani, S. (2005). Female competition in wild  
561 house mice depends upon timing of female/male settlement and kinship between females. *Animal*  
562 *Behaviour* 69, 1259–1271.
- 563 40. Hurst, J.L. (1987). Behavioural variation in wild house mice *Mus domesticus* Ruddy: A quantitative  
564 assessment of female social organization. *Animal Behaviour* 35, 1846–1857.
- 565 41. Chovnick, A., Yasukawa, N.J., Monder, H., and Christian, J.J. (1987). Female behavior in  
566 populations of mice in the presence and absence of male hierarchy. *Aggressive Behavior* 13, 367–  
567 375.
- 568 42. Chalfin, L., Dayan, M., Levy, D.R., Austad, S.N., Miller, R.A., Iraqi, F.A., Dulac, C., and Kimchi,  
569 T. (2014). Mapping ecologically relevant social behaviours by gene knockout in wild mice. *Nat*  
570 *Commun* 5, 4569.
- 571 43. Justice, M.J., and Dhillon, P. (2016). Using the mouse to model human disease: increasing validity  
572 and reproducibility. *Disease Models & Mechanisms* 9, 101–103.
- 573 44. Nelson, A.C., Cauceglia, J.W., Merkley, S.D., Youngson, N.A., Oler, A.J., Nelson, R.J., Cairns,  
574 B.R., Whitelaw, E., and Potts, W.K. (2013). Reintroducing domesticated wild mice to sociality  
575 induces adaptive transgenerational effects on MUP expression. *Proc. Natl. Acad. Sci. U.S.A.* 110,  
576 19848–19853.
- 577 45. Perlman, R.L. (2016). Mouse models of human disease: An evolutionary perspective. *Evolution,*  
578 *Medicine, and Public Health* 2016, 170–176.

- 579 46. Worp, H.B. van der, Howells, D.W., Sena, E.S., Porritt, M.J., Rewell, S., O'Collins, V., and  
580 Macleod, M.R. (2010). Can Animal Models of Disease Reliably Inform Human Studies? *PLOS*  
581 *Medicine* 7, e1000245.
- 582 47. Cope, E.C., Opendak, M., LaMarca, E.A., Murthy, S., Park, C.Y., Olson, L.B., Martinez, S., Leung,  
583 J.M., Graham, A.L., and Gould, E. (2019). The effects of living in an outdoor enclosure on  
584 hippocampal plasticity and anxiety-like behavior in response to nematode infection. *Hippocampus*  
585 29, 366–377.
- 586 48. Daan, S., Spoelstra, K., Albrecht, U., Schmutz, I., Daan, M., Daan, B., Rienks, F., Poletaeva, I.,  
587 Dell'Omo, G., and Vyssotski, A. (2011). Lab mice in the field: unorthodox daily activity and effects  
588 of a dysfunctional circadian clock allele. *Journal of biological rhythms* 26, 118–129.
- 589 49. Leung, J.M., Budischak, S.A., The, H.C., Hansen, C., Bowcutt, R., Neill, R., Shellman, M., Loke,  
590 P., and Graham, A.L. (2018). Rapid environmental effects on gut nematode susceptibility in  
591 rewilded mice. *PLOS Biology* 16, e2004108.
- 592 50. Lin, J.-D., Devlin, J.C., Yeung, F., McCauley, C., Leung, J.M., Chen, Y.-H., Cronkite, A., Hansen,  
593 C., Drake-Dunn, C., Ruggles, K.V., et al. (2020). Rewilding Nod2 and Atg16l1 Mutant Mice  
594 Uncovers Genetic and Environmental Contributions to Microbial Responses and Immune Cell  
595 Composition. *Cell Host & Microbe* 27, 830-840.e4.
- 596 51. Yeung, F., Chen, Y.-H., Lin, J.-D., Leung, J.M., McCauley, C., Devlin, J.C., Hansen, C., Cronkite,  
597 A., Stephens, Z., Drake-Dunn, C., et al. (2020). Altered Immunity of Laboratory Mice in the Natural  
598 Environment Is Associated with Fungal Colonization. *Cell Host & Microbe* 27, 809-822.e6.
- 599 52. Filazzola, A., and Cahill Jr, J.F. (2021). Replication in field ecology: Identifying challenges and  
600 proposing solutions. *Methods in Ecology and Evolution* 12, 1780–1792.
- 601 53. Fraser, H., Barnett, A., Parker, T.H., and Fidler, F. (2020). The role of replication studies in ecology.  
602 *Ecology and Evolution* 10, 5197–5207.
- 603 54. Anderson, P.K. (1961). Density, social structure, and nonsocial environment in house-mouse  
604 populations and the implications for regulation of numbers. *Transactions of the New York Academy*  
605 *of Sciences* 23, 447–451.
- 606 55. Guo, M., Wu, C.F., Liu, W., Yang, J.Y., and Chen, D. (2004). Sex difference in psychological  
607 behavior changes induced by long-term social isolation in mice. *Progress in Neuro-*  
608 *Psychopharmacology and Biological Psychiatry* 28, 115–121.
- 609 56. Koike, H., Ibi, D., Mizoguchi, H., Nagai, T., Nitta, A., Takuma, K., Nabeshima, T., Yoneda, Y., and  
610 Yamada, K. (2009). Behavioral abnormality and pharmacologic response in social isolation-reared  
611 mice. *Behavioural brain research* 202, 114–121.
- 612 57. Matthews, G.A., Nieh, E.H., Vander Weele, C.M., Halbert, S.A., Pradhan, R.V., Yosafat, A.S.,  
613 Globber, G.F., Izadmehr, E.M., Thomas, R.E., Lacy, G.D., et al. (2016). Dorsal Raphe Dopamine  
614 Neurons Represent the Experience of Social Isolation. *Cell* 164.

- 615 58. Nonogaki, K., Nozue, K., and Oka, Y. (2007). Social isolation affects the development of obesity  
616 and type 2 diabetes in mice. *Endocrinology* *148*, 4658–4666.
- 617 59. Zelikowsky, M., Hui, M., Karigo, T., Choe, A., Yang, B., Blanco, M.R., Beadle, K., Gradinaru, V.,  
618 Deverman, B.E., and Anderson, D.J. (2018). The Neuropeptide Tac2 Controls a Distributed Brain  
619 State Induced by Chronic Social Isolation Stress. *Cell* *173*, 1265-1279.e19.
- 620 60. Kaufmann, J.H. (1983). On the Definitions and Functions of Dominance and Territoriality.  
621 *Biological Reviews* *58*, 1–20.
- 622 61. Pyke, G.H. (1979). The Economics of Territory Size and Time Budget in the Golden-Winged  
623 Sunbird. *The American Naturalist* *114*, 131–145.
- 624 62. Stamps, J. (1994). Territorial Behavior: Testing the Assumptions. *Advances in the Study of*  
625 *Behavior* *23*, 173–232.
- 626 63. Chambers, L.K., Singleton, G.R., and Krebs, C. (2000). Movements and Social Organization of  
627 Wild House Mice (*Mus Domesticus*) in the Wheatlands of Northwestern Victoria , Australia.  
628 *Journal of Mammalogy* *81*, 59–69.
- 629 64. Singleton, G.R. (1983). The Social and Genetic Structure of a Natural Colony of House Mice, *Mus*  
630 *musculus*, at Healesville WildlifeSanctuary. *Aust. J. Zool.* *31*, 155–166.
- 631 65. Barton, R.A., Byrne, R.W., and Whiten, A. (1996). Ecology, feeding competition and social  
632 structure in baboons. *Behavioral Ecology and Sociobiology* *38*, 321–329.
- 633 66. Faulkes, C.G., Bennett, N.C., Bruford, M.W., O'Brien, H.P., Aguilar, G.H., and Jarvis, J.U.M.  
634 (1997). Ecological constraints drive social evolution in the African mole-rats. *Proceedings of the*  
635 *Royal Society of London Series B-Biological Sciences* *264*, 1619–1627.
- 636 67. Lukas, D., and Clutton-Brock, T. Climate and the distribution of cooperative breeding in mammals.  
637 *Royal Society Open Science* *4*, 160897.
- 638 68. Elliser, C.R., and Herzing, D.L. (2014). Social structure of Atlantic spotted dolphins, *Stenella*  
639 *frontalis*, following environmental disturbance and demographic changes. *Marine Mammal Science*  
640 *30*, 329–347.
- 641 69. Ostfeld, R.S., Lidicker, W.Z., and Heske, E.J. (1985). The Relationship between Habitat  
642 Heterogeneity, Space Use, and Demography in a Population of California Voles. *Oikos* *45*, 433–  
643 442.
- 644 70. Palombit, R.A., Seyfarth, R.M., and Cheney, D.L. (1997). The adaptive value of ‘friendships’ to  
645 female baboons: experimental and observational evidence. *Animal Behaviour* *54*, 599–614.
- 646 71. Evans, J.C., Liechti, J.I., Boatman, B., and König, B. (2020). A natural catastrophic turnover event:  
647 individual sociality matters despite community resilience in wild house mice. *Proceedings of the*  
648 *Royal Society B: Biological Sciences* *287*, 20192880.

- 649 72. Lukas, D., and Clutton-Brock, T. (2012). Cooperative breeding and monogamy in mammalian  
650 societies. *Proceedings of the Royal Society B-Biological Sciences* 279, 2151–2156.
- 651 73. Dobson, F.S., Way, B.M., and Baudoin, C. (2010). Spatial dynamics and the evolution of social  
652 monogamy in mammals. *Behavioral Ecology* 21, 747–752.
- 653 74. Perez-Barberia, F.J., Shultz, S., and Dunbar, R.I.M. (2007). Evidence for coevolution of sociality  
654 and relative brain size in three orders of mammals. *Evolution* 61, 2811–2821.
- 655 75. Schradin, C. (2013). Intraspecific variation in social organization by genetic variation,  
656 developmental plasticity, social flexibility or entirely extrinsic factors. *Philosophical Transactions of*  
657 *the Royal Society B: Biological Sciences* 368, 20120346.
- 658 76. Schradin, C., Hayes, L.D., Pillay, N., and Bertelsmeier, C. (2018). The evolution of intraspecific  
659 variation in social organization. *Ethology* 124, 527–536.
- 660 77. Li, S.W., Zeliger, O., Strahs, L., Báez-Mendoza, R., Johnson, L.M., McDonald Wojciechowski, A.,  
661 and Williams, Z.M. (2022). Frontal neurons driving competitive behaviour and ecology of social  
662 groups. *Nature* 603, 661–666.
- 663 78. Clutton-Brock, T. (2021). Social evolution in mammals. *Science* 373, eabc9699.
- 664 79. König, B., Lindholm, A.K., Macholan, M., Baird, S.J., Munclinger, P., and Pialek, J. (2012). The  
665 complex social environment of female house mice (*Mus domesticus*). *Cambridge studies in*  
666 *morphology and molecules: new paradigms in evolutionary bio*, 114–134.
- 667 80. Wolff, J.O. (1993). Why are female small mammals territorial? *Oikos*, 364–370.
- 668 81. Wolff, J.O. (2007). Social biology of rodents. *Integrative Zoology* 2, 193–204.
- 669 82. Rowe, F.P., and Redfern, R. (1969). Aggressive behaviour in related and unrelated wild house mice  
670 (*Mus musculus* L.). *Annals of Applied Biology* 64, 425–431.
- 671 83. Barnard, C.J., and Fitzsimons, J. (1989). Kin recognition and mate choice in mice: fitness  
672 consequences of mating with kin. *Animal Behaviour* 38, 35–40.
- 673 84. Krackow, S., and Matuschak, B. (1991). Mate Choice for Non-siblings in Wild House Mice:  
674 Evidence from a Choice Test and a Reproductive Test. *Ethology* 88, 99–108.
- 675 85. Lee, W., Milewski, T.M., Dworz, M.F., Young, R.L., Gaudet, A.D., Fonken, L.K., Champagne,  
676 F.A., and Curley, J.P. (2021). Distinct inflammatory and transcriptomic profiles in dominant versus  
677 subordinate males in mouse social hierarchies. 2021.09.04.458987.
- 678 86. Phifer-Rixey, M., and Nachman, M.W. (2015). The natural history of model organisms: insights into  
679 mammalian biology from the wild house mouse *Mus musculus*. *Elife* 4, e05959.

- 680 87. Phifer-Rixey, M., Bi, K., Ferris, K.G., Sheehan, M.J., Lin, D., Mack, K.L., Keeble, S.M., Suzuki,  
681 T.A., Good, J.M., and Nachman, M.W. (2018). The genomic basis of environmental adaptation in  
682 house mice. *PLoS Genetics* *14*, e1007672.
- 683 88. Hatchwell, B.J. (2017). Replication in behavioural ecology: a comment on Ihle et al. *Behavioral*  
684 *Ecology* *28*, 360–360.
- 685 89. Kelly, C.D. (2006). Replicating empirical research in behavioral ecology: how and why it should be  
686 done but rarely ever is. *The Quarterly review of biology* *81*, 221–236.
- 687 90. Farine, D.R. (2013). Animal social network inference and permutations for ecologists in R using  
688 *asnipe*. *Methods in Ecology and Evolution* *4*, 1187–1194.
- 689 91. Aplin, L.M., Firth, J.A., Farine, D.R., Voelkl, B., Crates, R.A., Culina, A., Garroway, C.J., Hinde,  
690 C.A., Kidd, L.R., Psorakis, I., et al. (2015). Consistent individual differences in the social  
691 phenotypes of wild great tits, *Parus major*. *Animal Behaviour* *108*, 117–127.
- 692 92. Farine, D.R., and Whitehead, H. (2015). Constructing, conducting and interpreting animal social  
693 network analysis. *Journal of Animal Ecology* *84*, 1144–1163.
- 694 93. Bates, D., Mächler, M., Bolker, B., and Walker, S. (2014). Fitting Linear Mixed-Effects Models  
695 using *lme4*.
- 696 94. Kuznetsova, A., Brockhoff, P.B., and Christensen, R.H.B. (2017). *lmerTest* Package: Tests in Linear  
697 Mixed Effects Models. *Journal of Statistical Software* *82*, 1–26.
- 698 95. Lenth, R.V. (2016). Least-Squares Means: The R Package *lsmeans*. *Journal of Statistical Software*  
699 *69*, 1–33.
- 700 96. Wickham, H. (2016). Programming with *ggplot2*. In *ggplot2: Elegant Graphics for Data Analysis*  
701 *Use R!*, H. Wickham, ed. (Springer International Publishing), pp. 241–253.
- 702
